# Supplementary material for: Spatial–Temporal Variations in Atmospheric Factors Contribute to SARS-CoV-2 Outbreak
Source: PubMed Central journal article supplement (PMC7354543; doi:10.3390/v12060588), 2020-05-27
Supplement: viruses-12-00588-s001.pdf [file viruses-12-00588-s001.pdf]

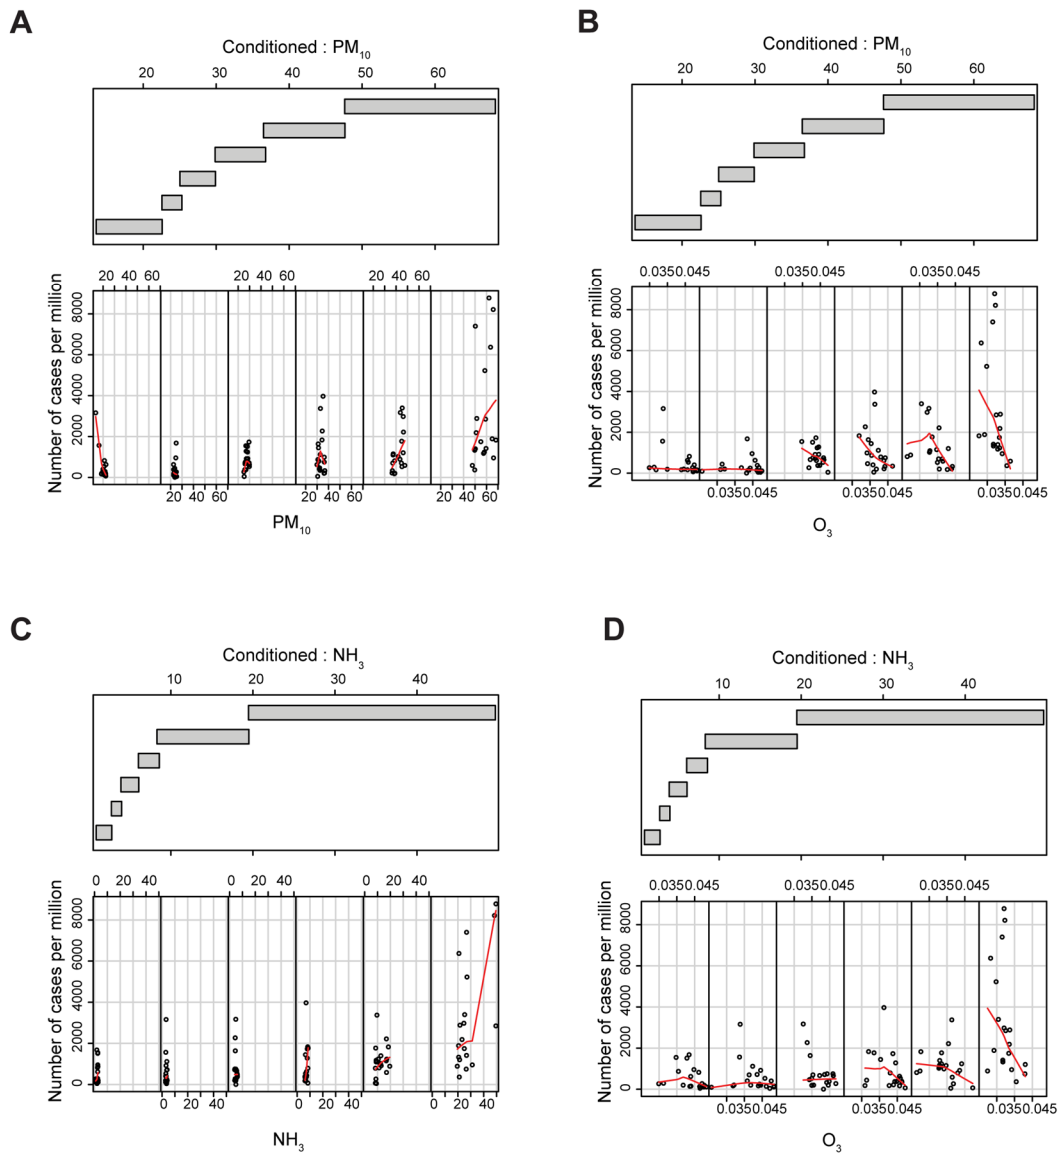

**Figure S1.** Evaluation of the cross-influence among  $PM_{10}$ ,  $NH_3$  and  $O_3$ . Conditioned plots with six levels of conditioning. Lower panel: the scatter plots between the selected factor and the number of cases per million. Each plot is restricted to show data points that belong to the provinces that fall in the corresponding range of the conditioning factor. Upper plot: the range of the values that define each level of conditioning. The overlapping among the levels is 0.1. The LOESS curve is computed in each scatterplot and shown in red. A) the scatterplot of  $PM_{10}$  conditioned to  $PM_{10}$ ; B) the scatterplot of  $O_3$  conditioned to  $PM_{10}$ ; C) the scatterplot of  $NH_3$  conditioned to  $NH_3$ ; D) the scatterplot of  $O_3$  conditioned to  $NH_3$ .

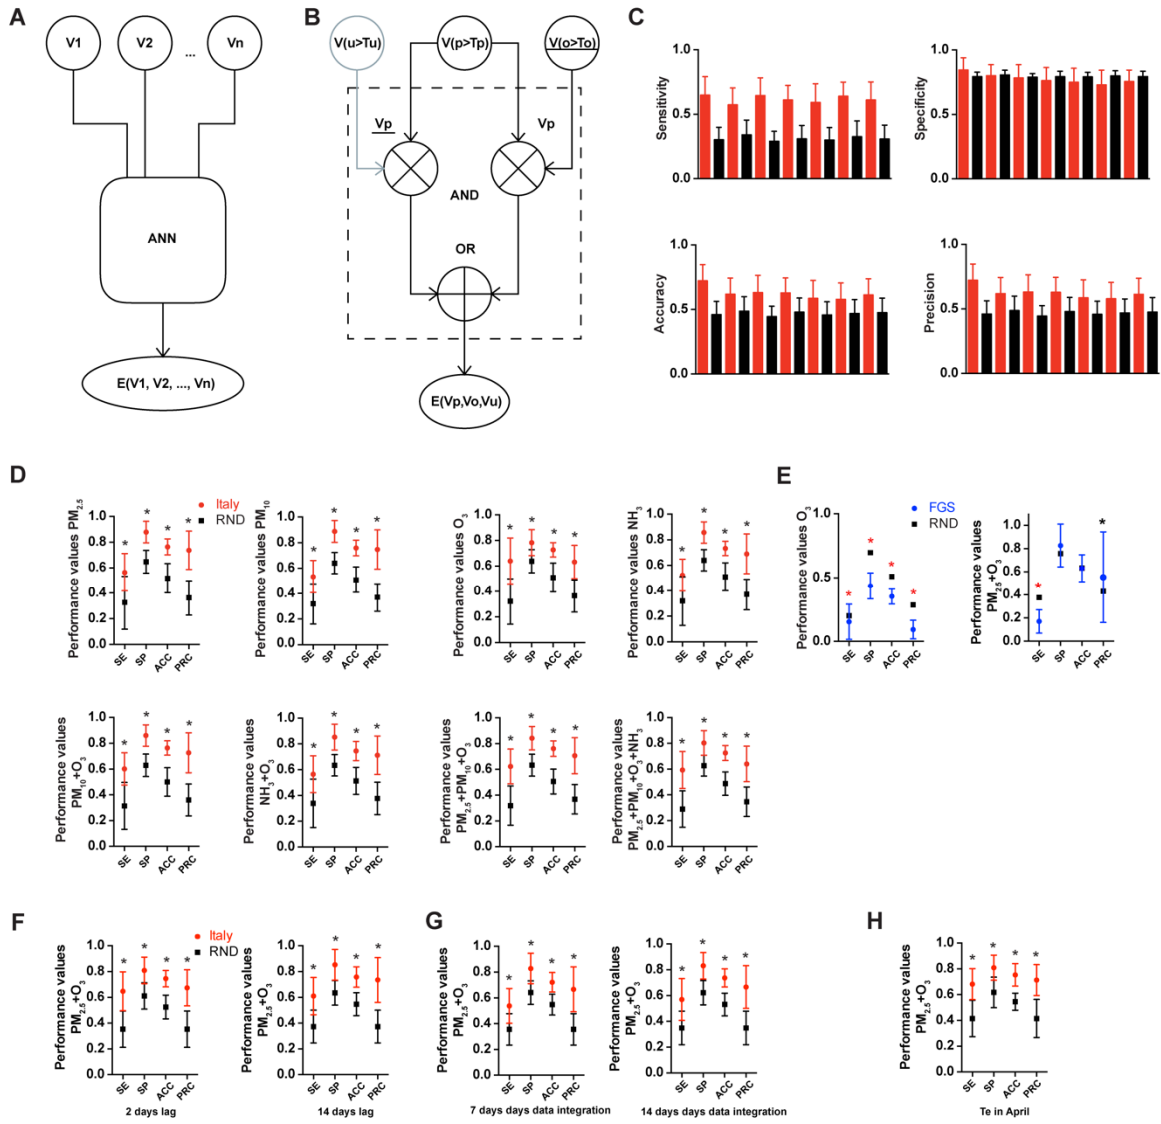

**Figure S2.** ANN and approximated logic model schema. A) The schematic design of the ANN classifier. A set of  $N$  input nodes are filled with a combination of the measurement of atmospheric factors  $V_1, V_2, \dots, V_n$ . The output of the ANN is a function  $E(V_1, V_2, \dots, V_n)$  on the atmospheric variables  $V_1, V_2, \dots, V_n$ . B) Intuitive boolean diagram of the model suggested by our conclusions.  $V_p, V_o,$  and  $V_u$  are three input signals that correspond to  $PM_{2.5}, O_3,$  and an unknown generic variable. The three variables are mapped to  $\{0,1\}$  using a threshold function where  $V_x=1$  if the concentration of  $x$  is bigger than a threshold  $T_x$  and  $V_x=0$  otherwise. The threshold  $T_x$  is implicitly determined by the neural network. The notation  $\bar{V}$  indicates the negation of  $V$ .  $\oplus$  represents an OR and  $\otimes$  an AND gate.  $E(V_p, V_o, V_u)$  is the binary output of our model given  $V_p, V_o,$  and  $V_u$ . ANN performance evaluation. C) Performance indexes of the ANN varying the number of hidden nodes from 3 to 15 (step of 2). The bars represent the standard deviations of 100 Monte Carlo cross-validations. Italian provinces data are represented in red histograms, random data in black histograms. D) Performance values of the ANN on the 107 Italian provinces data varying the input variables. SE sensitivity, SP specificity, ACC accuracy, PRC precision. The dots represent the ANN average performance based on 100 Monte Carlo cross-validations. Bars represent the standard deviation. Italian provinces (red dots); France, Germany and Spain (FGS) regions (blue dots) and random dataset (black dots). E) Performance values of the ANN on the 47 FGS regions using atmospheric values ( $PM_{2.5}, O_3$ ). FGS (blue dots), and random dataset (black dots). Performance values of the ANN on the 107 Italian

provinces data varying the input variables. SE sensitivity, SP specificity, ACC accuracy, PRC precision: F) lag of 2 and 14 days G) 7 and 14 days of average exposure H) Escalation threshold analysis on the 15<sup>th</sup> of April. Statistical analysis were performed using multiple t test corrected with Sidak-Boneferroni method for multiple comparisons ( $p < 0.001$ ). Red asterisk indicates that the classifier performs worse than the null classifier.

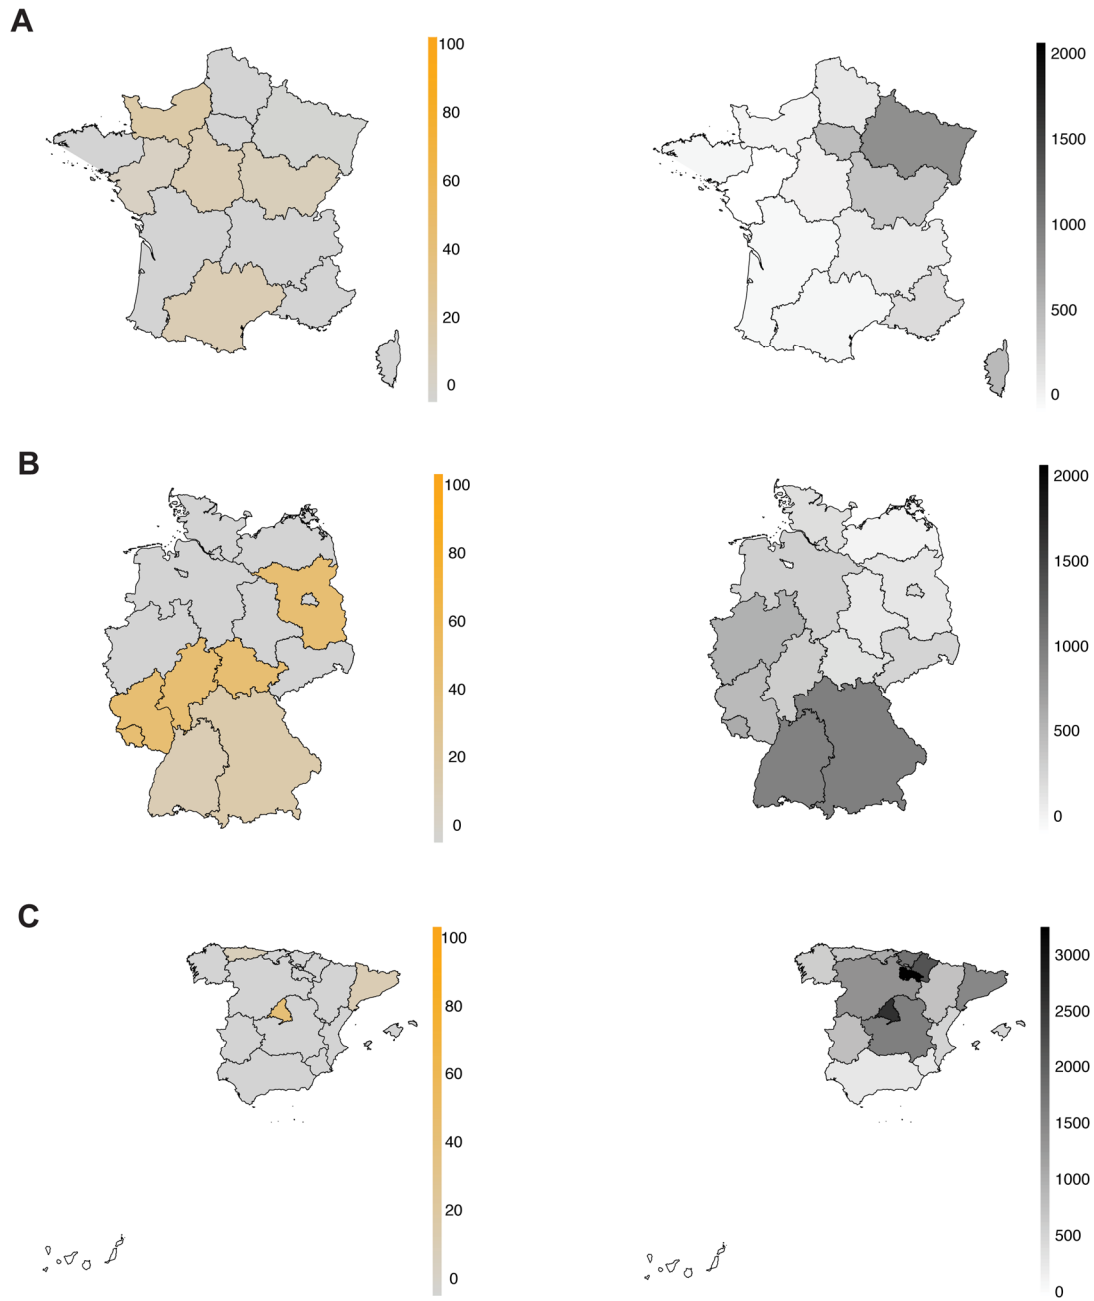

**Figure S3.** The spatial administrative maps representing prediction (orange) and actual reported cases per million (black) for A) France, B) Germany and C) Spain. Germany and Spain number of cases were limited to 2000 and 3000 cases per million to improve the dynamic range of the maps. The color intensity on the prediction maps represents the number of times that regions were positive for the outbreak in one hundred predictions.

Supplementary Table S1. Spearman coefficients.

|                       | PD     | PM <sub>10</sub> max | PM <sub>10</sub> sum | PM <sub>2.5</sub> max | PM <sub>2.5</sub> sum | NH <sub>3</sub> sum | NH <sub>3</sub> max | O <sub>3</sub> max | O <sub>3</sub> sum | TD     | T      | RH     | WIND   | P      | Cas    |
|-----------------------|--------|----------------------|----------------------|-----------------------|-----------------------|---------------------|---------------------|--------------------|--------------------|--------|--------|--------|--------|--------|--------|
| PD                    | 1.000  | 0.377                | 0.325                | 0.354                 | 0.303                 | 0.048               | 0.084               | -0.244             | -0.276             | 0.045  | 0.094  | -0.108 | 0.006  | 0.188  | 0.034  |
| PM <sub>10</sub> max  | 0.377  | 1.000                | 0.989                | 0.990                 | 0.985                 | 0.762               | 0.787               | -0.587             | -0.792             | -0.209 | -0.136 | -0.282 | -0.441 | 0.269  | 0.586  |
| PM <sub>10</sub> sum  | 0.325  | 0.989                | 1.000                | 0.973                 | 0.983                 | 0.794               | 0.816               | -0.561             | -0.773             | -0.142 | -0.077 | -0.234 | -0.392 | 0.332  | 0.583  |
| PM <sub>2.5</sub> max | 0.354  | 0.990                | 0.973                | 1.000                 | 0.993                 | 0.765               | 0.787               | -0.621             | -0.820             | -0.300 | -0.221 | -0.336 | -0.520 | 0.192  | 0.597  |
| PM <sub>2.5</sub> sum | 0.303  | 0.985                | 0.983                | 0.993                 | 1.000                 | 0.796               | 0.815               | -0.612             | -0.818             | -0.282 | -0.209 | -0.315 | -0.511 | 0.213  | 0.598  |
| NH <sub>3</sub> sum   | 0.048  | 0.762                | 0.794                | 0.765                 | 0.796                 | 1.000               | 0.995               | -0.468             | -0.624             | -0.237 | -0.181 | -0.251 | -0.383 | 0.138  | 0.676  |
| NH <sub>3</sub> max   | 0.084  | 0.787                | 0.816                | 0.787                 | 0.815                 | 0.995               | 1.000               | -0.472             | -0.634             | -0.227 | -0.168 | -0.253 | -0.377 | 0.164  | 0.693  |
| O <sub>3</sub> max    | -0.244 | -0.587               | -0.561               | -0.621                | -0.612                | -0.468              | -0.472              | 1.000              | 0.906              | 0.471  | 0.351  | 0.502  | 0.439  | 0.025  | -0.444 |
| O <sub>3</sub> sum    | -0.276 | -0.792               | -0.773               | -0.820                | -0.818                | -0.624              | -0.634              | 0.906              | 1.000              | 0.453  | 0.341  | 0.478  | 0.535  | -0.052 | -0.496 |
| TD                    | 0.045  | -0.209               | -0.142               | -0.300                | -0.282                | -0.237              | -0.227              | 0.471              | 0.453              | 1.000  | 0.942  | 0.566  | 0.792  | 0.789  | -0.327 |
| T                     | 0.094  | -0.136               | -0.077               | -0.221                | -0.209                | -0.181              | -0.168              | 0.351              | 0.341              | 0.942  | 1.000  | 0.255  | 0.755  | 0.860  | -0.284 |
| RH                    | -0.108 | -0.282               | -0.234               | -0.336                | -0.315                | -0.251              | -0.253              | 0.502              | 0.478              | 0.566  | 0.255  | 1.000  | 0.432  | 0.155  | -0.253 |
| WIND                  | 0.006  | -0.441               | -0.392               | -0.520                | -0.511                | -0.383              | -0.377              | 0.439              | 0.535              | 0.792  | 0.755  | 0.432  | 1.000  | 0.509  | -0.327 |
| P                     | 0.188  | 0.269                | 0.332                | 0.192                 | 0.213                 | 0.138               | 0.164               | 0.025              | -0.052             | 0.789  | 0.860  | 0.155  | 0.509  | 1.000  | -0.025 |
| Cas                   | 0.034  | 0.586                | 0.583                | 0.597                 | 0.598                 | 0.676               | 0.693               | -0.444             | -0.496             | -0.327 | -0.284 | -0.253 | -0.327 | -0.025 | 1.000  |

Supplementary Table S2. ANN performance.

| Days     | SE avg | SP avg | ACC avg | PRE avg | SE sd | SP sd | ACC sd | SP sd |
|----------|--------|--------|---------|---------|-------|-------|--------|-------|
| 27       | 0.644  | 0.862  | 0.780   | 0.737   | 0.140 | 0.092 | 0.064  | 0.136 |
| 14       | 0.570  | 0.831  | 0.737   | 0.666   | 0.162 | 0.103 | 0.070  | 0.166 |
| 7        | 0.538  | 0.828  | 0.721   | 0.666   | 0.135 | 0.118 | 0.076  | 0.174 |
| 27 RND   | 0.309  | 0.636  | 0.503   | 0.361   | 0.156 | 0.089 | 0.107  | 0.113 |
| 14 RND   | 0.349  | 0.622  | 0.531   | 0.349   | 0.130 | 0.094 | 0.088  | 0.130 |
| 7 RND    | 0.356  | 0.641  | 0.548   | 0.356   | 0.122 | 0.091 | 0.081  | 0.122 |
| Lag days | SE avg | SP avg | ACC avg | PRE avg | SE sd | SP sd | ACC sd | SP sd |
| 14       | 0.610  | 0.853  | 0.758   | 0.735   | 0.145 | 0.119 | 0.079  | 0.174 |
| 6        | 0.644  | 0.862  | 0.780   | 0.737   | 0.140 | 0.092 | 0.064  | 0.136 |
| 2        | 0.647  | 0.809  | 0.745   | 0.674   | 0.151 | 0.103 | 0.064  | 0.140 |

| 14 RND          | 0.373  | 0.635  | 0.547   | 0.373   | 0.127 | 0.095 | 0.089  | 0.127 |
|-----------------|--------|--------|---------|---------|-------|-------|--------|-------|
| 6 RND           | 0.309  | 0.636  | 0.503   | 0.361   | 0.156 | 0.089 | 0.107  | 0.113 |
| 2 RND           | 0.353  | 0.611  | 0.525   | 0.353   | 0.141 | 0.102 | 0.092  | 0.141 |
| Escalation date | SE avg | SP avg | ACC avg | PRE avg | SE sd | SP sd | ACC sd | SP sd |
| 25 Mar          | 0.644  | 0.862  | 0.780   | 0.737   | 0.140 | 0.092 | 0.064  | 0.136 |
| 15 Apr          | 0.681  | 0.809  | 0.753   | 0.713   | 0.120 | 0.097 | 0.087  | 0.120 |
| 25 Mar RND      | 0.309  | 0.636  | 0.503   | 0.361   | 0.156 | 0.089 | 0.107  | 0.113 |
| 15 Apr RND      | 0.415  | 0.617  | 0.545   | 0.415   | 0.141 | 0.118 | 0.066  | 0.148 |
